# Supplementary material for: Rural Computed Tomography - a model for access to rapid stroke care in sparsely populated areas?
Source: Research Square preprint supplement (doi:10.21203/rs.3.rs-7742574/v1), 2025-11-11
Supplement: Supplementary file 1 [file e43804ccf240401d1769ab31.docx]

**Supplementary Materials**

**Supplementary Table 1**

| **Table 1. Estimation time components from onset of symptoms to treatment for the rural subgroup in the existing situation.** | | | | | | |
| --- | --- | --- | --- | --- | --- | --- |
| Onset of symptoms to alarm | |  | |  | **Median**  34 min | **IQR**  (25-40) |
| Alarm to arrival of ambulance |  | | |  | 25 min | (18-35) |
| Ambulance on scene time  Transport time  Door to needle time | | |  |  | 21 min  105 min  30 min | (16-27)  (83-135)  (25-38) |
| Onset of symptoms to treatment | | |  |  | 215 min |  |

**Supplementary Table 2**

| **Table 2. Gamma distribution to model activity duration** |  |
| --- | --- |
| **Activity duration** | **Parameters** |
| Ictus to alarm | shape α = 11.56 ; scale β = 2.94 |
| Alarm to arrival of ambulance | shape α = 6.25 ; scale β = 4 |
| Ambulance on scene | shape α = 4.41 ; scale β = 4.76 |
| Transport time – rural subgroup: 0 CT | shape α = 6.89 ; scale β = 15.24 |
| Transport time – rural subgroup: 10 CT | shape α = 6.08 ; scale β = 12.16 |
| Transport time – rural subgroup:2 0 CT | shape α = 2.56 ; scale β = 18.75 |
| Transport time – rural subgroup: 30 CT | shape α = 1.07 ; scale β = 29.03 |
| Door to needle time | shape α = 9; scale β = 3.33 |

**
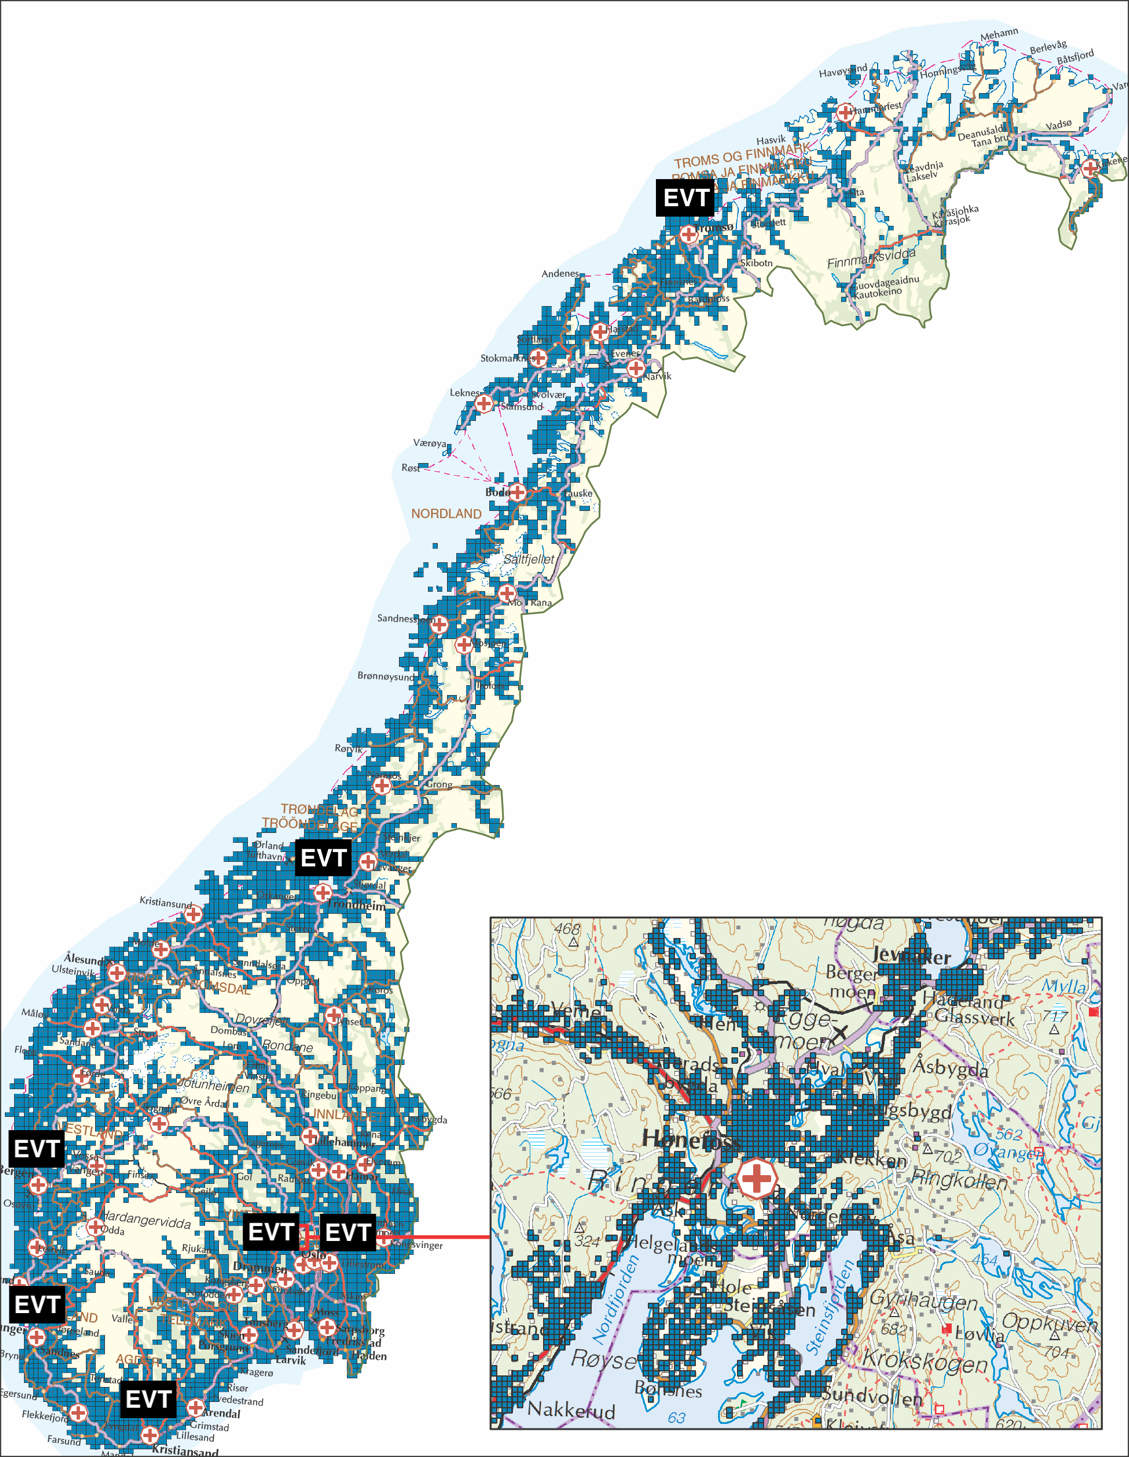
**

**Supplementary Figure 1.** Norway divided in populated geographical polygons of 250 m2. Red crosses represent the 48 hospitals in which acute stroke patients are admitted. EVT: Comprehensive Stroke Centres providing Endovascular Treatment


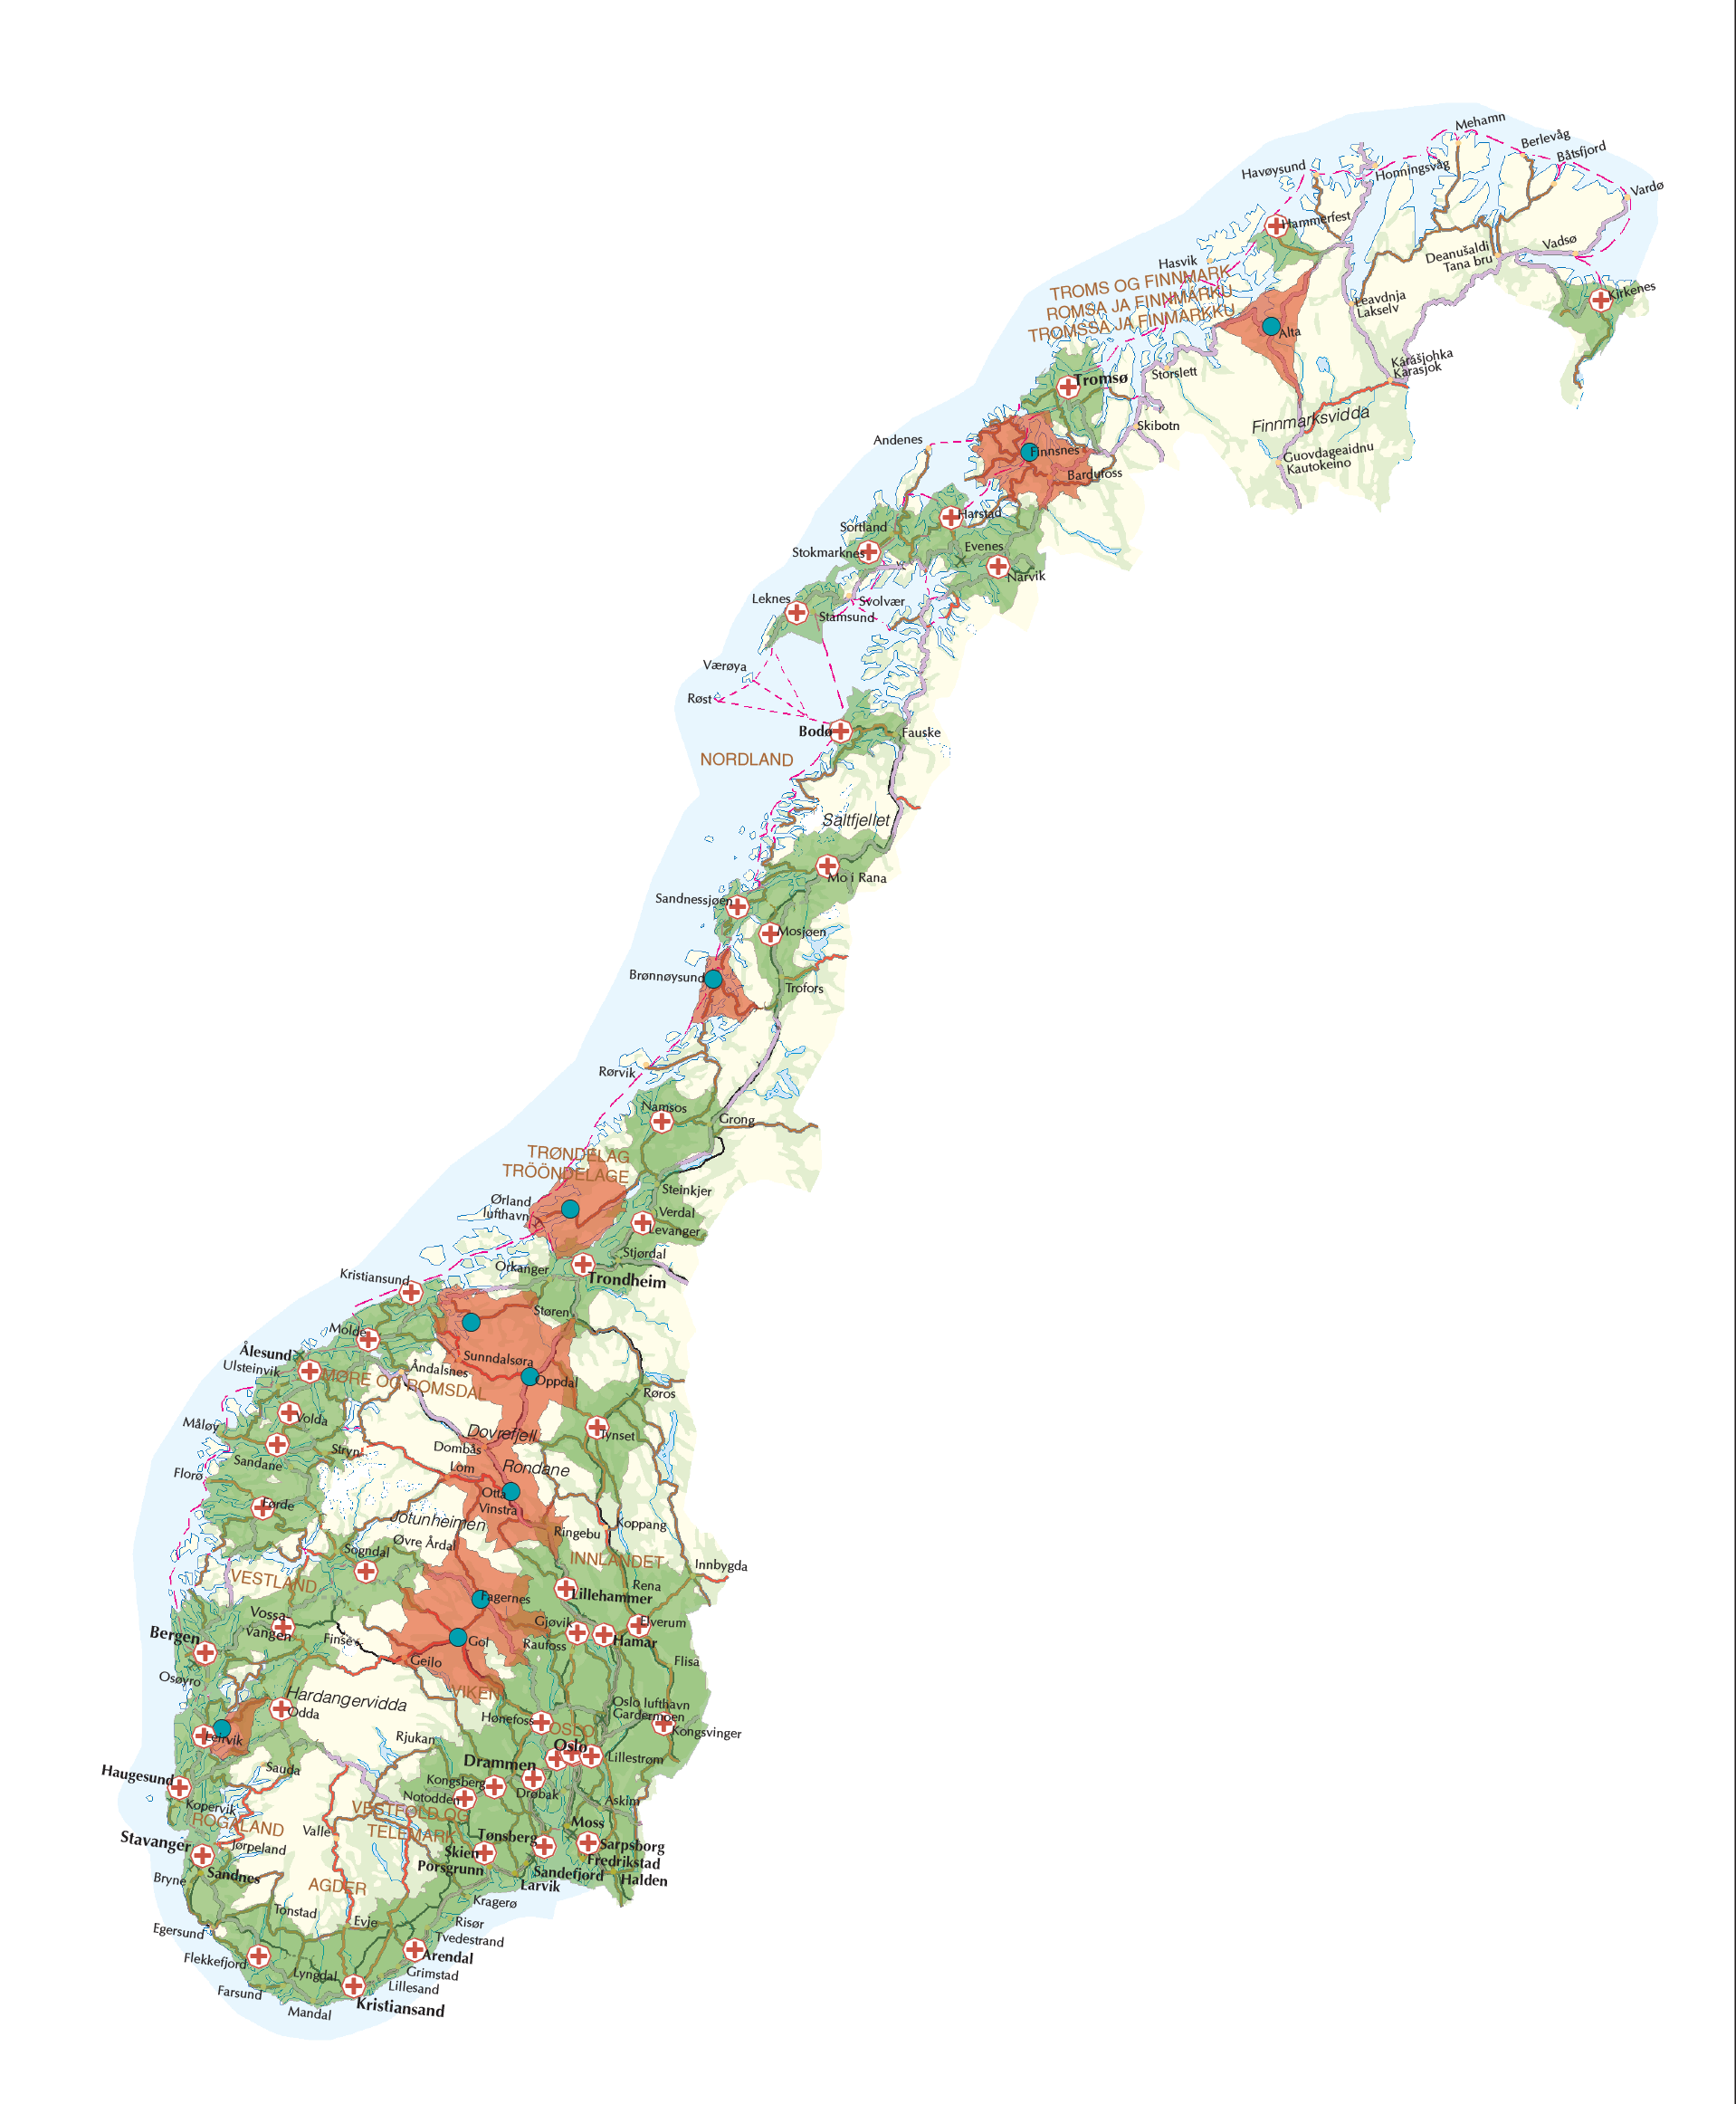


**Supplementary Figure 2.** The deployment of 10 CT stations for the rural subgroup. Green color depicts areas in which the population live < 70 minutes of ambulance transport time from an existing hospital. Red color depicts catchment areas for the deployed CT stations with ambulance transport time < 70 minutes.


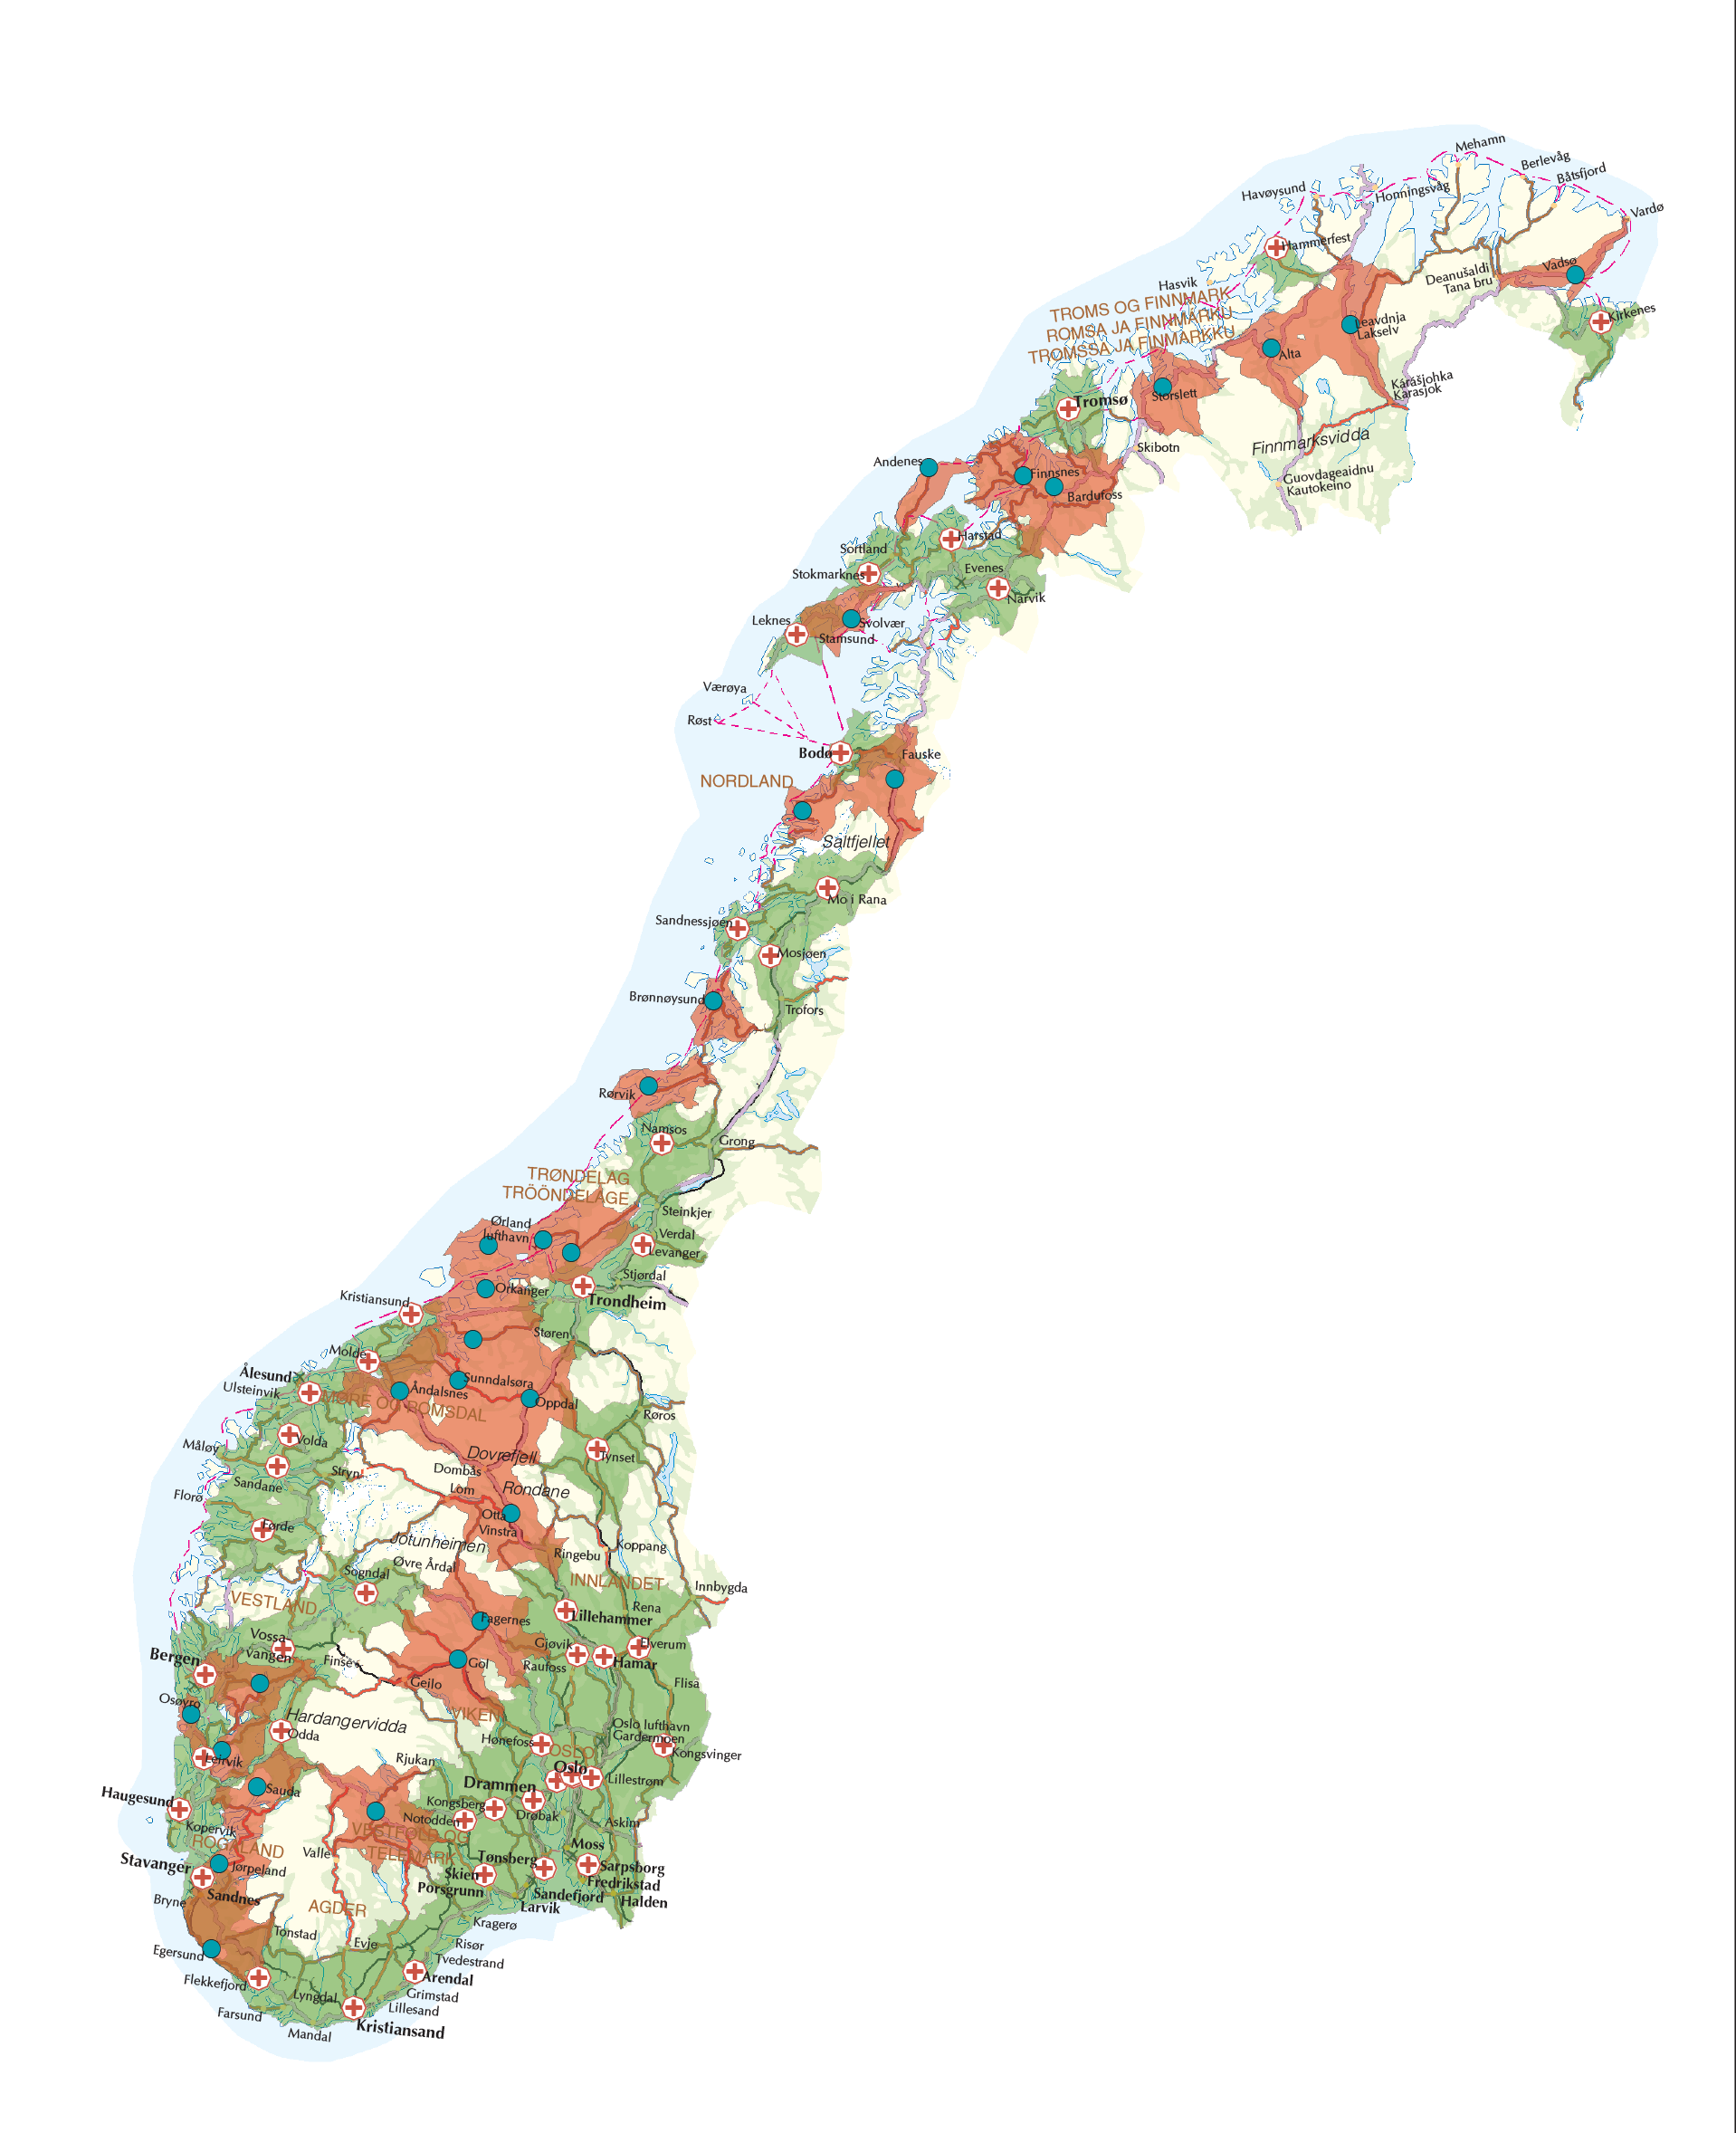


**Supplementary Figure 3.** The deployment of 30 CT stations for the rural subgroup. Green color depicts areas in which the population live < 70 minutes of ambulance transport time from an existing hospital. Red color depicts catchment areas for the deployed CT stations with ambulance transport time < 70 minutes.
